## An open source plant kinase chemogenomics set

Maria Florencia Ercoli<sup>3</sup> \*, Priscila Zonzini Ramos<sup>1\*</sup>, Rashmi Jain<sup>3\*</sup>, Joseph Pilotte<sup>4,5</sup>,  
Oliver Xiaoou Dong<sup>3</sup>, Ty Thompson<sup>3</sup>, Carrow I. Wells<sup>4,5</sup>, Jonathan M. Elkins<sup>1,2</sup>, Aled M  
Edwards<sup>6</sup> Rafael M. Couñago<sup>1</sup>, David H. Drewry<sup>4,5</sup> and Pamela C. Ronald<sup>3#</sup>

<sup>1</sup>Centro de Química Medicinal (CQMED), Centro de Biologia Molecular e Engenharia  
Genética (CBMEG), Universidade Estadual de Campinas (UNICAMP), Campinas, SP,  
13083-875, Brazil

<sup>2</sup>Centre for Medicines Discovery, University of Oxford, Old Road Campus Research  
Building, Roosevelt Drive, Oxford, OX3 7DQ, UK.

<sup>3</sup>Department of Plant Pathology and the Genome Center, University of California, Davis,  
CA, USA

<sup>4</sup>Structural Genomics Consortium (SGC), UNC Eshelman School of Pharmacy, University  
of North Carolina at Chapel Hill (UNC-CH), Chapel Hill, NC 27599, USA

<sup>5</sup>Division of Chemical Biology and Medicinal Chemistry, UNC Eshelman School of  
Pharmacy, UNC-CH, Chapel Hill, NC 27599, USA

<sup>6</sup> Structural Genomics Consortium, University of Toronto, Toronto, Canada.

\*These authors contributed equally to this work

# Corresponding author: (pcronald@ucdavis.edu)

Short title: “**Chemical inhibition of plant kinases**”

The author responsible for distribution of materials integral to the findings presented in this  
article in accordance with the policy described in the Instructions for Authors

32 (www.plantcell.org) is: [pcronald@ucdavis.edu](mailto:pcronald@ucdavis.edu) for kinases; [David.drewry@unc.edu](mailto:David.drewry@unc.edu) for  
33 chemicals.

34

### 35 **Keywords**

36 *Oryza sativa*, plant kinases, ligation-independent cloning, protein production, compound  
37 screening, thermal shift assay

38

### 39 **Abstract**

40 129 protein kinases, selected to represent the diversity of the rice (*Oryza sativa*)  
41 kinome, were cloned and tested for expression in *E. coli*. 40 of these rice kinases were  
42 purified and screened using differential scanning fluorimetry (DSF) against 627 diverse  
43 kinase inhibitors, with a range of structures and activities targeting diverse human kinases.  
44 37 active compounds were then tested for their ability to modify primary root development  
45 in Arabidopsis. Of these, 14 compounds caused a significant reduction of primary root  
46 length and two slightly increased root elongation compared with control plants. Two  
47 inhibitory compounds bind to the predicted orthologue of Arabidopsis PSKR1, one of two  
48 receptors for PSK, a small sulfated peptide that positively controls root development.  
49 Inhibition could not be rescued by the exogenous addition of the PSK peptide, suggesting  
50 that chemical treatment may inhibit both PSKR1 and its closely related receptor PSKR2. Of  
51 the compounds acting as root growth inhibitors in Arabidopsis, six conferred the same  
52 effect in rice. Compound RAF265 (CHIR-265), previously shown to bind the human kinase  
53 BRAF (B-Raf proto-oncogene, serine/threonine kinase), also binds to nine highly  
54 conserved rice kinases tested. The binding of human and rice kinases to the same  
55 compound suggests that human kinase inhibitor sets will be useful for dissecting the  
56 function of plant kinases.

57

### 58 **Introduction**

59 Protein phosphorylation is the most common form of posttranslational modification  
60 used in signal transduction by eukaryotic cells. In plants, protein kinases regulate key  
61 biological responses, such as hormone levels, metabolism, morphology, growth, and  
62 development (Deprost et al., 2007; Wang et al., 2010; Garcia et al., 2012; Marshall et al.,

63 2012; Bhargava and Sawant, 2013; Osakabe et al., 2013; Danquah et al., 2014; Wierzba  
64 and Tax, 2013; Wu and Cheng, 2014; Todaka et al., 2015). As in other eukaryotes, protein  
65 kinases constitute one of the largest protein families within plant genomes. In rice (*Oryza*  
66 *sativa*), there are about 1,500 genes that encode for recognizable protein kinase domains  
67 (~3.5% of the rice genome), the vast majority of which remain uncharacterized (Manning et  
68 al., 2002; Goff et al., 2002; Yu et al., 2002; Yamamoto et al., 2012; Chandran et al., 2016).

69 Genetic approaches, such as gene knockouts, have successfully identified plant  
70 kinases that mediate important traits but can be confounded by the fact that many plant  
71 genes have functionally redundant paralogues (Hicks and Raikhel, 2009). As a result, more  
72 than 40% of the genes in a plant genome are “invisible” to single knockout genetic screens.  
73 In addition, genes that cause lethality when knocked out cannot be discovered in these  
74 screens. This gap presents an opportunity for basic and applied science.

75 An alternative approach to genetic manipulation is to use a chemical biology  
76 strategy based on small molecule modulators of protein kinase function (Hicks and Raikhel,  
77 2009, 2014). Protein kinases share similar ATP-binding sites, and it is not uncommon for  
78 small molecule kinase inhibitors to be active against multiple, closely related kinases,  
79 suggesting that a kinase inhibitor may chemically “knockout” paralogues or even small  
80 families of kinases. Thus, using sets of carefully selected, well-characterized kinase  
81 inhibitors that cover most of an organism’s kinome in phenotypic assays allows the  
82 observed biological effect to be narrowed down to a small number of kinases (Uitdehaag et  
83 al., 2012). For human proteins, the construction of such a kinase chemogenomic set has  
84 allowed this strategy to successfully illuminate new biology and discover new therapeutic  
85 opportunities (Al-Ali et al., 2015; Jones and Bunnage, 2017; Burdova et al., 2019; Wells et  
86 al., 2021). A similar approach has also been used to perform cost-effective, chemistry-  
87 based synthetic lethal screens in plants (Hicks and Raikhel, 2009; Xuan et al., 2013; Hicks  
88 and Raikhel, 2014). Nevertheless, the lack of well-characterized small molecule reagents  
89 has limited the exploration of plant kinomes.

90 Establishing a well-characterized, broadly distributed Rice Kinase Chemogenomic  
91 Set would allow the scientific community to explore the function of rice kinases and deepen  
92 our understanding of plant signaling pathways. This endeavor would require the  
93 recombinant production of soluble, active rice kinases, the establishment of high-

94 throughput screening (HTS) assays to identify small molecule ligands from libraries of  
95 compounds, and iterative chemistry to optimize compound selectivity profiles. These  
96 compounds would then be used in phenotypic screens to investigate the biological impact  
97 of modulating the function(s) of the target kinase(s). The on-target activity of inhibitors that  
98 confer interesting phenotypes could then be verified via chemoproteomics and further  
99 validated using genetic tools, such as the creation of rice knockout lines (Huber and  
100 Superti-Furga, 2016). Broad distribution would allow the community to use this compound  
101 set in a range of phenotypic assays relevant to different facets of plant biology.

102         Importantly, the conservation of the overall protein kinase architecture, biochemical  
103 activity, and ATP-binding site across distantly-related species should allow the knowledge,  
104 protocols, assays, and reagents obtained during the development of the human kinase  
105 chemogenomic set to be used in the establishment of a similar set of reagents for rice  
106 kinases. Indeed, it is now well-established that small molecule inhibitors originally  
107 designed for human kinases are also active against kinases from unrelated organisms, such  
108 as eukaryotic parasites and plants (Peña et al., 2015; Aquino et al., 2017; Alam et al.,  
109 2019). Likewise, the strategy to combine available structural information with high-  
110 throughput cloning adopted by structural genomics initiatives to expedite the recombinant  
111 production of soluble, active human proteins (Savitsky et al., 2010) has also been shown  
112 effective for plant proteins (Tosarini et al., 2018). Finally, HTS assays used to identify  
113 ligands for human proteins (Niesen et al., 2007) have been applied with success for plant  
114 protein kinases (Aquino et al., 2017).

115         Here we established the groundwork for the creation of a Rice Kinase  
116 Chemogenomic Set and identified a previously unknown connection between 16  
117 compounds and primary root length. We also show that one compound, previously shown  
118 to bind the human kinase BRAF (B-Raf proto-oncogene, serine/threonine kinase), also  
119 binds at least to nine rice kinases. Our data thus suggests that the methods used for the  
120 generation of the human kinase chemogenomics set are readily applicable to dissecting  
121 kinase function in plants. Further, we show that small molecule kinase inhibitors can be  
122 used to identify new biological processes, contributing to the development of knowledge  
123 that will be of interest to the wider plant science community.

124

125

## 126 **Results**

### 127 **Selection of protein kinases**

128 The rice genome has 1,467 genes encoding a recognizable protein kinase domain.  
129 These can be divided into 63 distinct kinase families belonging to six kinase groups (AGC,  
130 CAMK, CK1, CMGC, STE and TKL) based on sequence identity levels as established by  
131 the rice kinase phylogenomics database (Dardick et al., 2007; Jung et al., 2015) (Figure 1).  
132 To select a representative set of protein kinase genes from the rice genome, we first  
133 checked expression values of these genes in 21 available RNA-Seq libraries from the Rice  
134 Genome Annotation Project database containing data from samples collected from various  
135 rice tissues during different developmental stages or under various biotic and abiotic  
136 stresses (Kawahara et al., 2013). We selected 975 genes having expression levels  $\geq 2.0$   
137 from this analysis.

138 We next employed RICENet v2, a probabilistic gene network to enrich for trait-  
139 associated genes amongst the selected 975 rice protein kinase-encoding genes (Lee et al.,  
140 2011, 2015). This analysis resulted in the selection of 141 kinase-encoding genes  
141 representing 45 out of the 63 kinase families predicted to participate in independent  
142 pathways. Then, we selected one kinase-encoding gene from each of the remaining 18  
143 kinase families to ensure that at least each kinase family was represented by at least one  
144 member. Finally, we also included in our set three well-studied kinase-encoding genes: the  
145 kinase domain of the rice disease resistance gene XA21(AAC49123) (Song et al., 1997),  
146 the XA21-coreceptor (OsSERK2, LOC\_Os04g38480) (Chen et al., 2014), and a histidine  
147 kinase (LOC\_Os06g44410) (Taylor et al., 2021) known to regulate rice root development.  
148 Thus, the initially selected set consisted of 162 genes. We further predicted domain  
149 information of these kinases using Pfam (Mistry et al., 2021). Out of the 162 selected rice  
150 genes, we removed 15 whose gene products lacked a predicted full kinase domain and thus  
151 are unlikely to bind inhibitors. Among the remaining genes, we could not obtain synthetic  
152 DNA for 18 due to gene synthesis failure (including the histidine kinase  
153 LOC\_Os06g44410). Following subtraction of these genes, the final set consisted of 129  
154 rice kinases representing diversity within the rice kinome that were successfully  
155 synthesized (Figure 1, Supplemental Table S1).

156

## 157 **Recombinant production of selected rice protein kinases**

158 Heterologous expression of eukaryotic genes in a bacterial host may lead to the  
159 production of insoluble or inactive recombinant protein. Here we adopted a high-  
160 throughput, protein structure-based strategy to quickly identify protein constructs that can  
161 be recombinantly produced in a soluble form in *Escherichia coli* (Savitsky et al., 2010;  
162 Tosarini et al., 2018). For each of the 129 selected rice protein kinase genes, we designed  
163 an average of four different constructs for expression of the isolated kinase domain with  
164 varying N- and C-termini. Construct design was based on the best matches from the Protein  
165 Data Bank (PDB) for each of the selected rice kinases, identified using the PSIPRED server  
166 (Buchan and Jones, 2019). DNA fragments representing each of these kinase domain  
167 truncations were obtained via PCR using the appropriate set of synthetic DNA template and  
168 oligonucleotide primers (see Supplemental Data Set 1). Amplicons were cloned via  
169 ligation-independent cloning into a pET28-based expression vector which added a  
170 cleavable 6xHis tag to the N-terminus of the recombinant protein (Aslanidis and de Jong,  
171 1990; Stols et al., 2002; Strain-Damerell et al., 2014). In total, 515 constructs, representing  
172 all 129 selected rice kinase-encoding genes, were successfully cloned (see Supplemental  
173 Data Set 1).

174 Soluble recombinant production of all 515 rice kinase constructs in two different  
175 *E. coli* strains was evaluated using small-scale test expression (1 mL cultures) followed by  
176 purification via ion metal affinity chromatography (IMAC, facilitated by the presence of  
177 the N-terminal 6xHis tag in the recombinant protein) from clarified cell lysates. IMAC  
178 eluates were visualized by denaturing polyacrylamide gel electrophoresis (SDS-PAGE).  
179 These analyses revealed that 286 of the 515 constructs (55.5%) could be purified from  
180 clarified cell lysates - as indicated by the presence of a protein band of the expected  
181 molecular weight (see Supplemental Data Set 1; Supplemental Figure S1). Overall, we  
182 could detect the soluble production of 85 out of the 129 selected rice protein kinases (66%).  
183 40 of these protein kinases were then purified in milligram scale for chemical screening  
184 studies.

185

## 186 **Ligand identification**

187 To identify ligands for the purified rice kinases from a library of commercially-  
188 available human kinase inhibitors, we used a thermal-stability assay (Differential Scanning  
189 Fluorimetry, DSF). This assay is based on the ability of a ligand to stabilize a target protein  
190 and increase its temperature-induced unfolding midpoint ( $T_m$ ) compared to a no-ligand  
191 control (reported as a  $\Delta T_m$ ). DSF has been extensively employed to assess binding of  
192 compounds to target protein kinases and to estimate compound promiscuity (Fedorov et al.,  
193 2012; Elkins et al., 2016). Compound library selection took into account three main criteria.  
194 First, all compounds used here are readily-available from commercial vendors. This makes  
195 it easy to obtain compounds for follow-up phenotypic assays in plants, which are likely to  
196 use large quantities of material. Secondly, the 627 compounds included in our library have  
197 a wide range of chemical scaffolds. As the development of plant kinase inhibitors is still in  
198 its infancy, we opted to use a library with a large chemical diversity. Finally, compounds in  
199 our library target a wide range of human kinases having diverse biological functions (see  
200 Supplemental Data Set 2).

201 Using DSF, we collected temperature denaturation curves for 40 purified kinases in  
202 the presence of each one of the 627 compounds in our library (plus vehicle - DMSO; and  
203 positive - staurosporine; control). A complete matrix of the thermal shift data is available in  
204 Supplemental Data Set 2. A hit was defined as a compound that increased thermal  
205 stabilization at least 2x the standard deviation of the DMSO control (Chilton et al., 2017).  
206 An example plot of the data and hit identification is depicted in Figure 2A for Os01g01410-  
207 cb-001.

208 As expected, the overall results mirror previous experiments that interrogated a  
209 panel of human kinases with a set of kinase inhibitors (Bamborough et al., 2008; Posy et  
210 al., 2011; Fedorov et al., 2012; Elkins et al., 2016). In “all versus all” screens, one often  
211 identifies promiscuous compounds that bind to many targets, selective compounds that bind  
212 very few targets, promiscuous kinase targets that bind a variety of chemotypes, and kinase  
213 targets that are more difficult to inhibit and bind relatively few structural classes of  
214 inhibitors. Hit rates ranged from a high of 6.8% for Os01g60330-cb001 (43 hits) to a low of  
215 0.8% for Os01g51400-cb002 (5 hits) (Figure 2B).

216 Figure 2C shows the compounds that qualified as a hit for at least one kinase in the  
217 panel, sorted by the number of kinases hit. Three promiscuous human kinase inhibitors

218 (staurosporine, dorsomorphin, URM-09928) are highlighted that also demonstrate  
219 promiscuous binding in this small rice kinase panel. 28 of the 40 rice kinases showed  
220 significant stabilization with staurosporine, a very promiscuous human kinase inhibitor. 20  
221 of the compounds stabilized (implying a binding event) 10 or more of these rice kinases  
222 screened (Figure 2C). 416 of the compound did not significantly stabilize any of these rice  
223 kinases.

224 Finally, a number of FDA-approved kinase inhibitors are in this screening set, and  
225 many show binding to at least one rice kinases (see Supplemental Data Set 3). Some FDA-  
226 approved medicines, such as gilteritinib, sunitinib, and vemurafenib, stabilize 5 or more of  
227 these rice kinases. A number of quite selective human kinase inhibitors such as the ERBB2  
228 inhibitor lapatinib, EGFR inhibitor gefitinib, and MEK inhibitors trametinib and  
229 cobimetinib did not stabilize any of the rice kinases screened.

230

### 231 **Kinase inhibitors affect primary root development in Arabidopsis and rice**

232 From the set of rice kinase inhibitors that were identified by DSF, we selected a  
233 group of 37 compounds and tested them for their ability to affect plant development. This  
234 subset was chosen to include promiscuous inhibitors targeting several kinases  
235 simultaneously and compounds that specifically bind a small group of kinases  
236 (Supplemental Table S2). Some of the rice kinases that these compounds bind and likely  
237 inhibit, include orthologues of Arabidopsis kinases as BRASSINOSTEROID  
238 INSENSITIVE 1 (BRI1) (Li and Chory, 1997; Friedrichsen et al., 2000; Hacham et al.,  
239 2011; Kang et al., 2017), SOMATIC EMBRYOGENESIS RECEPTOR-LIKE KINASE 1  
240 and 2 (SERK1 and SERK2) (Du et al., 2012; Gou et al., 2012), CYCLIN-DEPENDENT  
241 KINASE F;1 (Takatsuka and Umeda, 2014) and PHYTOSULFOKIN RECEPTOR 1  
242 (PSKR1) (Matsubayashi et al., 2002, 2006) which are known to control root development.  
243 Therefore, we decided to first test the activity of these compounds based on their ability to  
244 modify the primary root development using Arabidopsis.

245 Of the 37 compounds tested, 14 caused a significant reduction of primary root  
246 length (Figure 3A and 3B and Supplemental Figure S2A and S2B), and only 2 produced a  
247 mild increase of elongation compared to the control plants (Figure 3B).



248 We found that compounds #24 (Hesperadin) and #37 (Sitravatinib) each bind the  
249 rice kinase (LOC\_Os04g57630), which is predicted to be an orthologue of Arabidopsis  
250 PSKR1 (AtPSKR1) (see Supplemental Data Set 2), the main receptor of PSK, a small  
251 sulfated peptide that positively controls root development (Matsubayashi et al., 2006;  
252 Matsuzaki et al., 2010) (Figure 3C). *pskr1* is phenotypically indistinguishable from WT and  
253 still responds to synthetic peptide treatment due to the presence of a second PSK receptor  
254 (AtPSKR2) that shares almost 50% sequence with AtPSKR1; a double mutant (*pskr1*,  
255 *pskr2*) has shorter roots and is insensitive to PSK treatment (Amano et al., 2007; Pruitt et  
256 al., 2017). The short root phenotype observed after chemical treatment may be a  
257 consequence of the inhibition of both PSKR1 and PSKR2 (Figure 3B and 3C). In support of  
258 this hypothesis, we observed that exogenous addition of the PSK peptide did not rescue the  
259 short root growth phenotype in the presence of compound #24. In contrast, a significant  
260 response was obtained when combined with compound #37, although the effect was not  
261 enough to complement the phenotype to WT (Figure 3C). These results support the  
262 hypothesis that these compounds may be totally (compound #24) or partially (compound  
263 #37) inhibiting the kinase activity of AtPSKR1 and AtPSKR2. Another possibility is that  
264 the lack of response to PSK treatment is a consequence of the inhibition of a different set of  
265 kinases, which have a detrimental effect on root growth that is not rescued by PSK  
266 treatment.

267 We next tested the response of rice primary root development to the compounds  
268 showing the most significant effects in Arabidopsis. From the 9 compounds tested, 6  
269 caused a reduction in rice primary root development (Figure 3D and 3E).

270 Three compounds significantly affected Arabidopsis and rice seedling development  
271 (#1, #16, and #30) (Figure 3A, 3B, 3D, and 3E). Compound #1, staurosporine, stabilizes 28  
272 kinases in our panel, compound #16 (AD80) stabilizes 10 kinases, and compound #30  
273 (PIK-75) stabilizes 6 kinases. (Supplemental Table S2).

274 Overall, these results indicate that some of the human kinase inhibitors that can  
275 interact with plant kinases based on DSF cause a modification in root growth. Further work  
276 is needed to establish structure-activity relationships for individual kinases, verify  
277 inhibition of kinase activity in the plant, and build our understanding of the consequences  
278 of poly-pharmacology (inhibition of multiple kinases by one compound) on phenotype.

279

280 **Multiple sequence alignments suggest that compound RAF265 targets similar**  
281 **regions in human and rice kinases**

282 We next compared the BRAF human kinase with 9 rice kinases stabilized by the  
283 same compound RAF265 (CHIR-265). Multiple sequence alignment using the online tool  
284 clustal omega (v 1.2.4) revealed that all eleven subdomains indicative of a protein kinase  
285 (Hanks et al., 1988) are conserved in the 9 rice kinases and the BRAF human kinase  
286 (Supplemental Figure S3). Strikingly, subdomain VI, containing the HRD motif important  
287 for catalysis and ending in an invariant Asn involved in substrate binding is particularly  
288 well conserved. Furthermore, examination of the BRAF residues involved in binding  
289 compound RAF265 according to the co-crystal structure in the PDB (ID 5CT7) (Williams  
290 et al., 2015) reveals that these residues are generally highly conserved in the 9 rice kinases  
291 (Supplemental Figure S3). These results suggest that RAF265 inhibits the function of both  
292 plant and animal kinases in the same manner, as an ATP competitive inhibitor.

293

294 **Materials and Methods.**

295

296 **Cloning of rice protein kinase domains into expression vector:** Full-length coding DNA  
297 (cDNA) clones for the selected rice kinases were used as templates for PCR amplifications.  
298 Multiple fragments encompassing the kinase domains (KD) of these genes were amplified  
299 and cloned into expression vector pNIC28-Bsa4 (GenBank accession no. EF198106), using  
300 ligation-independent cloning (LIC) (Aslanidis and de Jong, 1990; Stols et al., 2002; Gileadi  
301 et al., 2008; Burgess-Brown et al., 2014). On average four constructs were designed for  
302 each target KD, varying the N- and C-terminal boundaries. T1 phage-resistant *Escherichia*  
303 *coli* Mach-1 cells (Invitrogen, Carlsbad, USA) were used for general cloning. Proteins  
304 cloned into pNIC28-Bsa4 vector are fused to an amino-terminal tag of 22 residues  
305 (MHHHHHHSSGVDLGTENLYFQ\*SM), including a hexahistidine (His6) and a TEV-  
306 protease cleavage site. LIC sites are separated by a “stuffer” fragment that contains the *B.*  
307 *subtilis* *sacB* gene, which allows negative selection on agar plates containing 5% sucrose  
308 (Stols et al., 2002). PCR fragments were annealed to the linearized vector through  
309 complementary single-stranded regions generated by the T4 DNA polymerase 3’-

310 exonuclease activity. Vector cloning sites were generated by cleavage at two sites by the  
311 restriction enzyme *BsaI*, followed by T4 DNA polymerase treatment in the presence of  
312 dGTP. The inserts were treated in the presence of dCTP. Clones were screened by colony  
313 PCR and verified by DNA sequencing, using primers specific to the vector: pLIC-F (5'-  
314 TGTGAGCGGATAACAATTCC-3') and pLIC-R (5'-AGCAGCCAACTCAGCTTCC-3').

315

### 316 **Small-scale test expression**

317 In order to generate expression clones, rice KD constructs were transformed into *E.*  
318 *coli* strains derived from BL21(DE3) and Rosetta 2 (Merck Millipore, Burlington, USA),  
319 BL21(DE3)-R3-pRARE2 and BL21(DE3)-R3-lambda-PPase. Strain BL21(DE3)-R3-  
320 pRARE2 is a phage-resistant derivative of BL21(DE3) transformed with the pRARE2  
321 plasmid from Rosetta 2 cells, which carries chloramphenicol resistance, while strain  
322 BL21(DE3)-R3-lambda-PPase is a phage-resistant derivative of BL21(DE3) transformed  
323 with a pACYC-derived plasmid that expresses the bacteriophage-lambda phosphatase as  
324 well as three rare tRNAs (Gileadi et al., 2008). Both strains were a kind gift of SGC-  
325 Oxford. To find the best constructs and the optimal expression conditions for protein  
326 production, all positive clones were evaluated by small-scale test expression followed by  
327 IMAC purification from clarified cell lysates. Small-scale test expressions followed the 1-  
328 mL expression system described previously (Savitsky et al., 2010; Burgess-Brown et al.,  
329 2014). In summary, overnight cultures of expression clones were prepared in 1 mL of  
330 Lysogeny broth (LB) medium containing antibiotics (50 µg/mL kanamycin and 34 µg/mL  
331 chloramphenicol) in a 96-well deep well block (Sarstedt), and cultures were grown  
332 overnight in a microplate shaker (Titramax 101, Heidolph) at 37 °C, shaking at 700 rpm.  
333 Overnight cultures (20 µL) were inoculated into 1 mL of Terrific broth (TB) medium  
334 containing only kanamycin (50 µg/mL) and incubated at 37 °C, shaking at 900 rpm, until  
335 an optical density at 600 nm (OD<sub>600</sub>) of 2-3. Then, expression was induced by adding 0.1  
336 mM IPTG and cultures were incubated overnight at 18 °C, shaking at 700 rpm. Cells were  
337 harvested by centrifugation (3,500x g for 20 min) and suspended in 200 µL of lysis buffer  
338 [50 mM 4-(2-hydroxyethyl)-1-piperazineethanesulfonic acid (HEPES) pH 7.5, 0.5 M NaCl,  
339 10% glycerol, 10 mM imidazole, 0.5 mM tris-(2-carboxyethyl) phosphine hydrochloride  
340 (TCEP)], containing 0.1% dodecyl maltoside (DDM), protease inhibitor cocktail EDTA-

341 free (cat. Number 539134 - Merck Millipore; 1:200), 0.5 mg/mL lysozyme and 50 units/mL  
342 benzonase. After freezing the cell suspensions at -80 °C for 20 min, the block was placed in  
343 a water bath for approximately 15 min at room temperature, allowing slight thawing.  
344 Samples were mixed and an aliquot (3 µL) of the total lysate fraction was removed from  
345 each well for future analysis. The lysate was clarified by centrifugation (3,500x g for 10  
346 min) and the supernatant collected in a fresh 96-well deep well block and incubated with 25  
347 µL of pre-equilibrated Ni-sepharose resin (GE Healthcare Life Sciences) in lysis buffer in a  
348 microplate shaker (Titramax 101, Heidolph) at 18 °C for 1 hour at 300-400 rpm. The  
349 contents of each well were transferred to a 96-well filter plate (Thomson), the resin was  
350 washed with 200 µL of wash buffer (50 mM HEPES pH 7.5, 0.5 M NaCl, 10% glycerol, 30  
351 mM imidazole, 0.5 mM TCEP) and centrifuged at 300x g for 1 min. The wash procedure  
352 was repeated three more times. Finally, 40 µL of elution buffer (50 mM HEPES pH 7.5, 0.5  
353 M NaCl, 10% glycerol, 300 mM imidazole, 0.5 mM TCEP) was added to each well and  
354 proteins were eluted from the resin by centrifugation at 300x g for 3 min. Eluted fractions  
355 were analyzed by sodium dodecyl sulfate polyacrylamide gel electrophoresis (SDS-PAGE).  
356 The identity of the purified proteins was further confirmed by LS-MS.

357

### 358 **Mid-scale protein expression and purification**

359 Protein expression and purification followed procedures previously described  
360 (Tosarini et al., 2018). Briefly, overnight starter cultures were grown in LB medium  
361 containing kanamycin (50 µg/mL) and chloramphenicol (34 µg/mL) in an incubator shaker  
362 at 37°C, 140 rpm. 5 mL of the starter culture were used to inoculate 500 mL of TB medium  
363 supplemented with kanamycin (50 µg/mL). Cells were cultivated at 140 rpm, and 37°C  
364 until an OD<sub>600</sub> ~1.8. The culture was then transferred to an incubator shaker at 18 °C and  
365 kept under 140 rpm. After a 30-min cool-down period, IPTG was added to a final  
366 concentration of 0.2 mM. Cells were further cultivated for 16 h at 18°C and 140 rpm. Cells  
367 were collected by centrifugation (15 min, 4,000 rpm at 4°C). The pellet was suspended in  
368 2x lysis buffer (1 mL per gram of cells) (1x lysis buffer is 50 mM HEPES pH 7.5, 0.5 M  
369 NaCl, 5.0 % (v/v) glycerol, 10 mM imidazole and 1 mM TCEP) supplemented with  
370 protease inhibitor cocktail EDTA-free (Merck Millipore; 1:200). Cells were stored at -80°C  
371 until use. Cells were lysed by sonication (Sonics Vibra Cell VCX750 ultrasonic cell

372 disrupter) on ice for 5 min (5 sec on, 10 sec off - amplitude = 35%). Polyethyleneimine  
373 (PEI - 5% (w/v), pH 7.5) was added to the cell lysate to a final concentration of 0.15%,  
374 prior to clarification by centrifugation (45 min, 17,000 rpm, 4°C). Recombinant proteins  
375 were enriched from the clarified lysate by gravity-flow metal ion affinity chromatography  
376 (IMAC). Chelating Sepharose Fast Flow resin (cat. Number 17057502 - GE Healthcare) was  
377 loaded with Ni<sup>2+</sup> according to the manufacturer's instructions. A total of 3 ml of Ni<sup>2+</sup>-  
378 loaded resin was packed into Econo-Pac columns (cat. Number 7321010 – Bio-Rad) and  
379 equilibrated with 3 column volumes (CV) of elution buffer (binding buffer supplemented  
380 with 300 mM imidazole - binding buffer is 50 mM HEPES, pH 7.5, 0.5 M KOAc, 10%  
381 glycerol, 50 mM arginine and glutamate, 10 mM imidazole, 1 mM TCEP) and 5 CV of  
382 binding buffer. Fractions for the flow-through, 10 mM imidazole wash (in binding buffer,  
383 10 CV), 30 mM imidazole wash (in binding buffer, 5 CV) and 300 mM imidazole elution  
384 (in binding buffer, 3 CV) were collected and analyzed by 12% SDS-PAGE. Selected IMAC  
385 fractions were pooled together and dialyzed (MW cut off 10 kDa) against excess gel  
386 filtration buffer (GF buffer is 10 mM HEPES, 0.5 M KOAc, 10% glycerol, 50 mM Arg-  
387 Glu, 1 mM TCEP). TEV protease (in a mass ratio of 1:10) was added directly to the  
388 dialysis bag. TEV protease treatment was performed overnight at 4 °C. Recombinant  
389 proteins lacking the 6His tag were further purified via reverse IMAC using 0.8 ml Ni<sup>2+</sup>-  
390 loaded Chelating Sepharose Fast Flow resin packed into poly-prep® chromatography  
391 columns (cat. Number 7311550 – Bio-Rad) and prepared as above. Fractions for the flow-  
392 through, 10 mM imidazole wash (in GF buffer, 10 CV), 30 mM imidazole wash (in GF  
393 buffer, 5 CV) and 300 mM imidazole elution (in GF buffer, 3 CV) were collected and  
394 analyzed by 12% SDS-PAGE. Reverse IMAC fractions containing the protein of interest  
395 were pooled together and concentrated to a final volume of 5.0 ml. Samples were clarified  
396 by centrifugation (10 min at 15,000 rpm and 4 °C) and injected onto a pre-equilibrated  
397 Hiload 16/600 Superdex 200 pg (in GF buffer) connected to an AKTApure system (GE  
398 Healthcare) set at 0.8 ml/min. Protein samples were concentrated by centrifugation using  
399 spin columns (MW cut off of 10 kDa) (cat number UFC501096– Merck Millipore). Protein  
400 concentration was estimated by UV using calculated extinction coefficients (42,400 mol/l  
401 l<sup>-1</sup>.cm<sup>-1</sup>). Protein samples were flash-frozen in a liquid nitrogen bath and stored at -80 °C  
402 until use.

403

#### 404 **Differential scanning fluorimetry (DSF)**

405 Small molecule screening by DSF was performed as described previously (Niesen  
406 et al., 2007; Fedorov et al., 2012). Briefly, the DSF assay was performed in the 96-well  
407 format. Purified rice kinase protein was diluted to 2  $\mu$ M kinase in 100 mM potassium  
408 phosphate pH 7.5, 150 mM NaCl, and 10% glycerol supplemented with 5  $\times$  SYPRO  
409 Orange (Invitrogen). All assay experiments used 19.5  $\mu$ L of 2  $\mu$ M kinase and SYPRO  
410 Orange mixture. Compounds solubilized in dimethyl sulfoxide (DMSO) were used at a 12.5  
411  $\mu$ M final concentration, with a 2.5% concentration of DMSO per well. PCR plates were  
412 sealed using optically clear films and transferred to a C1000 thermal cycler with CFX-96  
413 RT-PCR head (BioRad). The fluorescence intensity was measured over a temperature  
414 gradient from 25 to 95  $^{\circ}$ C at a constant rate of 0.05  $^{\circ}$ C/s. Curve fitting and protein melting  
415 temperatures were calculated based on a Boltzmann function fitting to experimental data  
416 (GraphPad Prism 8). Protein with the addition of 2.5% DMSO was used as a reference. All  
417 experiments were carried out in triplicate, and the mean of the  $\Delta T_m$  is reported.  
418 Compounds that provided negative values are presented as having a  $\Delta T_m$  of 0  $^{\circ}$ C.

419

#### 420 **Arabidopsis/rice seedling analysis.**

421 Seeds from *Arabidopsis thaliana* accession Col0 and from *Oryza sativa* ssp.  
422 japonica cultivar Kitaake were used in this study. For primary root analysis, *Arabidopsis*  
423 seeds were surface-sterilized in 70% ethanol and then stratified in 0.1% agarose in the dark  
424 (4 $^{\circ}$ C) for 2 to 3 days, while rice seeds were dehulled, surface-sterilized in 20% bleach for  
425 30 minutes, and then wash thoroughly with autoclaved water. The seeds were sown on a  
426 solid medium containing 1x Murashige and Skoog salt mixture, 1% sucrose (pH 5.8) in  
427 0.3% Gellex (Gellan Gum CAS#71010-52-1 Caisson Laboratories) supplemented with or  
428 without 1 $\mu$ M of the selected kinase inhibitor (see Supplemental Table S5 for a description  
429 of the compounds tested in this study). The inhibitors were stored as 10 $\mu$ M stocks in  
430 DMSO. Plates containing DMSO were used as controls. Synthetic PSK1 is tyrosine-  
431 sulfated and was obtained from Pacific Immunology (Ramona, CA, USA). The peptide was  
432 stored as 1  $\mu$ M stocks in water ddH<sub>2</sub>O. The top half of the Petri dish was sealed with  
433 Micropore tape to allow gas exchange and plates were placed vertically for 6 days in

434 chambers with 16-h-light/8-h-dark photoperiod at 21°C for Arabidopsis and for 7 days in  
435 incubators with 14-h-light/10-h-dark photoperiod at 28°C/24 °C for rice. The seeds  
436 germinated properly in the plates from all the inhibitors, discarding any effect these  
437 compounds might have on seed germination. Plates were photographed, and the root length  
438 was measured with Fiji (Schindelin et al., 2012).

#### 439 **Acknowledgments.**

440 This work was supported by the Foundation for Food and Agricultural Research  
441 (FFAR) grant #534683 to PCR.

442 PZR and RMC acknowledge support from CAPES (Coordenação de  
443 Aperfeiçoamento de Pessoal de Nível Superior; grant number: 88887.136386/2017-00),  
444 FAPESP (Fundação de Amparo à Pesquisa do Estado de São Paulo; grant numbers:  
445 2013/50724-5 and 2014/50897-0) and CNPq (Conselho Nacional de Desenvolvimento  
446 Científico e Tecnológico; grant number: 465651/2014-3). PZR received a CAPES post-  
447 doctoral fellowship (88887.136432/2017-00). MFE is a Latin American Fellow in the  
448 Biomedical Sciences, supported by the Pew Charitable Trusts.

449 Christian Rogers at the Sainsbury Laboratory for gene synthesis.

450

451 **Conflict of interest:** The authors report no conflicts of interest.

452

#### 453 **Author Contributions**

454 MF Ercoli: Root assays, data analysis.

455 PZ Ramos: Cloning into expression vector, small-scale test expression, data analysis

456 Rashmi Jain: Selection of kinases and Figure 1 (Phylogenetic tree), data analysis

457 J Pilotte: Protein production, DSF screening

458 Oliver Xiaou Dong: Coordinated the *de novo* synthesis of the 129 rice kinase genes.

459 Ty Thompson: Root assays

460 C Wells: DSF screening, data analysis

461 JM Elkins: Kinase domain analysis and expression construct design.

462 AM Edwards: project conceptualization.

463 RM Couñago: Manuscript writing, data analysis

464 PC Ronald: project conceptualization, manuscript writing

465 DH Drewry: project conceptualization, manuscript writing, data analysis

466 All: manuscript editing

467

468



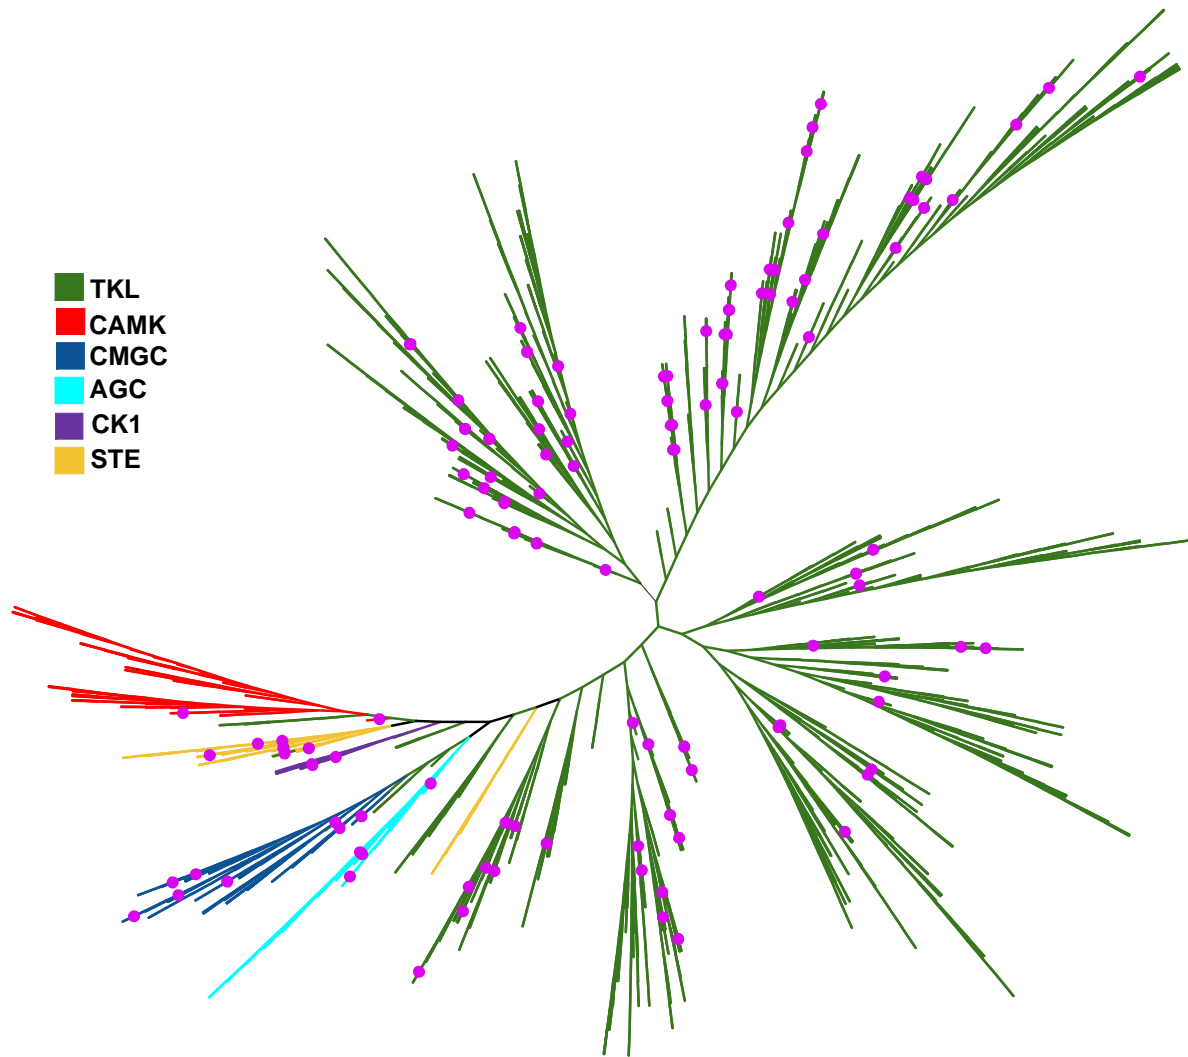

469

470

471 **Figure 1. A phylogenetic tree showing the rice kinases selected for this study (Pink dots).** The rice  
472 kinome contains 1,467 proteins that are classified into six kinase groups (TKL (Tyrosine Kinase-Like),  
473 Green; CAMK (Ca<sup>2+</sup>/calmodulin-dependent protein kinase), Red; CMGC (cyclin-dependent kinase (CDK),  
474 mitogen-activated protein kinase (MAPK), glycogen synthase kinase (GSK) and CDC-like kinase (CLK),  
475 Blue; AGC (AMP dependent kinases (PKA), cGMP-dependent kinases, and the diacylglycerol-  
476 activated/phospholipid-dependent kinase PKC), Cyan; CK1 (Casein kinase 1), Purple; STE (Sterile  
477 serine/threonine kinases), Saffron). The phylogenetic tree was constructed using the unweighted neighbor-  
478 joining method and drawn using Interactive Tree Of Life (iTOL) v5 online tool (Letunic & Bork, 2021).

479

480

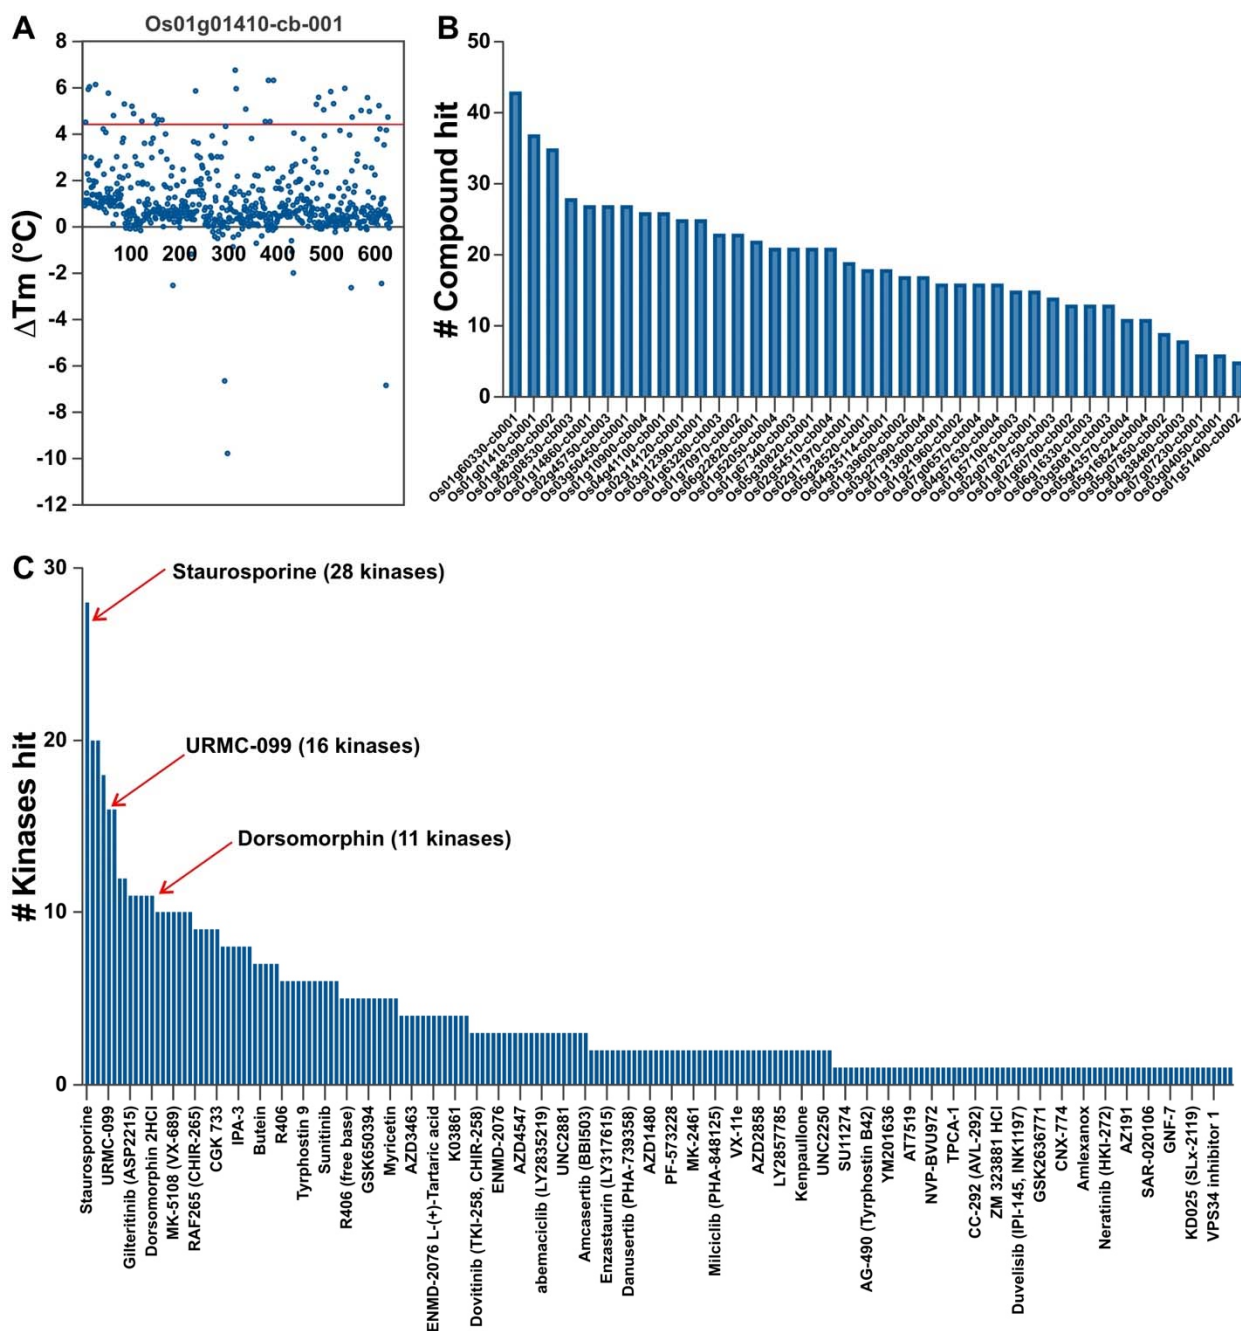

481

482 **Figure 2. Screening kinases inhibitors against a subset of rice kinases.** (A) Example thermal shift data set  
 483 from screening of 627 compounds against Os01g01410-cb-001. Most compounds show no stabilization of the  
 484 protein, with thermal shift ( $\Delta T_m$ ) values near 0 °C. The red line marks 2x the standard deviation of the  
 485 DMSO control, and hits are defined as compounds that lead to a temperature shift at or above this threshold.  
 486 (B) This bar chart depicts the number of compounds that are classified as hits in the  $\Delta T_m$  assay for each rice  
 487 kinase screened. Kinases to the left bind many different compounds, while kinases to the right bind only a few  
 488 of the molecules in the screening set. (C) This bar chart provides an indication of the promiscuity of these  
 489 compounds against this panel of rice kinases. More than a dozen of these compounds (left portion of the bar  
 490 chart) stabilize 10 or more kinases in the panel, indicating that they are relatively promiscuous, or non-

491 selective. Three of these compounds that are also known to be promiscuous against the human kinome are  
 492 marked.

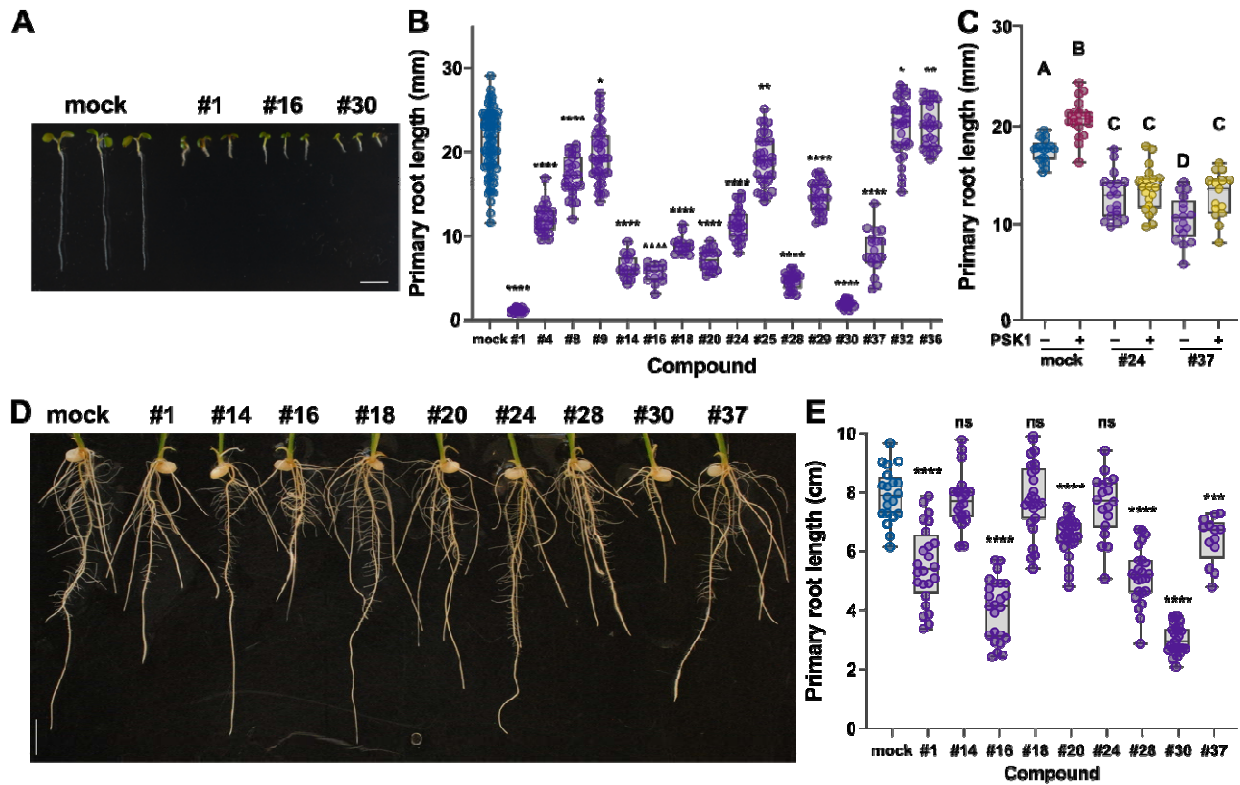

493

494

495 **Figure 3. Human kinase inhibitors modify primary root development in Arabidopsis and rice.**

496 (A) Root growth phenotype 6d after sowing of Col-0 seedlings grown on 1xMS vertical plates with or  
 497 without 1  $\mu$ M of the selected kinase inhibitor showing a significant effect on primary root growth. (B) and (C)  
 498 Primary root length (mm) 6d after sowing of Col-0 seedlings grown on 1xMS vertical plates with different  
 499 chemical treatments. In (B) plates were prepared with or without 1  $\mu$ M of the selected kinase inhibitor. In (C)  
 500 we used different combinations of two selected kinase inhibitors that are known to bind the rice orthologue of  
 501 AtPSKR1 (#24 and #37, 1  $\mu$ M) and PSK1 (100 nM). (D) Root growth phenotype and (E) primary root length  
 502 (cm) 7d after sowing of kitaake seedlings grown on 1xMS vertical plates with or without 1  $\mu$ M of the selected  
 503 kinase inhibitor. The data shown in (B), (C), and (E) are a box and whisker plot combined with scatter plots,  
 504 each dot indicates an individual measurement (n=20-30). In (B) and (E) P values are calculated by two-tailed  
 505 Student's t-test (\*P  $\leq$  0.05, \*\*P  $\leq$  0.01, \*\*\* P  $\leq$  0.001, \*\*\*\* P  $\leq$  0.0001). In (C) different letters indicate  
 506 significant differences, as determined by ANOVA followed by Tukey's multiple comparison test (P < 0.05).

507

508

509 **References:**

- 510 Al-Ali, H., Lee, D.H., Danzi, M.C., Nassif, H., Gautam, P., Wennerberg, K., Zuercher, B.,  
511 Drewry, D.H., Lee, J.K., Lemmon, V.P., and Bixby, J.L. (2015). Rational  
512 Polypharmacology: Systematically Identifying and Engaging Multiple Drug Targets  
513 To Promote Axon Growth. *ACS Chem. Biol.* 10: 1939–1951.
- 514 Alam, M.M. et al. (2019). Validation of the protein kinase PfCLK3 as a multistage cross-  
515 species malarial drug target. *Science* (80-. ). 365.
- 516 Amano, Y., Tsubouchi, H., Shinohara, H., Ogawa, M., and Matsubayashi, Y. (2007).  
517 Tyrosine-sulfated glycopeptide involved in cellular proliferation and expansion in  
518 Arabidopsis. *Proc. Natl. Acad. Sci. U. S. A.* 104: 18333–18338.
- 519 Aquino, B., Couñago, R.M., Verza, N., Ferreira, L.M., Massirer, K.B., Gileadi, O., and  
520 Arruda, P. (2017). Structural Characterization of Maize SIRK1 Kinase Domain  
521 Reveals an Unusual Architecture of the Activation Segment. *Front. Plant Sci.* 8.
- 522 Aslanidis, C. and de Jong, P.J. (1990). Ligation-independent cloning of PCR products  
523 (LIC-PCR). *Nucleic Acids Res.* 18: 6069–6074.
- 524 Bamborough, P., Drewry, D., Harper, G., Smith, G.K., and Schneider, K. (2008).  
525 Assessment of chemical coverage of kinome space and its implications for kinase drug  
526 discovery. *J. Med. Chem.* 51: 7898–7914.
- 527 Bhargava, S. and Sawant, K. (2013). Drought stress adaptation: metabolic adjustment and  
528 regulation of gene expression. *Plant Breed.* 132: 21–32.
- 529 Buchan, D.W.A. and Jones, D.T. (2019). The PSIPRED Protein Analysis Workbench: 20  
530 years on. *Nucleic Acids Res.* 47: W402–W407.
- 531 Burdova, K. et al. (2019). E2F1 proteolysis via SCF-cyclin F underlies synthetic lethality  
532 between cyclin F loss and Chk1 inhibition. *EMBO J.* 38.
- 533 Burgess-Brown, N.A., Mahajan, P., Strain-Damerell, C., Gileadi, O., and Gräslund, S.  
534 (2014). Medium-throughput production of recombinant human proteins: Protein  
535 production in *E. Coli*. *Methods Mol. Biol.* 1091: 73–94.

- 536 Chandran, A.K.N., Yoo, Y.H., Cao, P., Sharma, R., Sharma, M., Dardick, C., Ronald, P.C.,  
537 and Jung, K.H. (2016). Updated Rice Kinase Database RKD 2.0: enabling  
538 transcriptome and functional analysis of rice kinase genes. *Rice* (N. Y). 9.
- 539 Chen, X., Zuo, S., Schwessinger, B., Chern, M., Canlas, P.E., Ruan, D., Zhou, X., Wang, J.,  
540 Daudi, A., Petzold, C.J., Heazlewood, J.L., and Ronald, P.C. (2014). An XA21-  
541 associated kinase (OsSERK2) regulates immunity mediated by the XA21 and XA3  
542 immune receptors. *Mol. Plant* 7: 874–892.
- 543 Chilton, M., Clennell, B., Edfeldt, F., and Geschwindner, S. (2017). Hot-Spotting with  
544 Thermal Scanning: A Ligand-and Structure-Independent Assessment of Target  
545 Ligandability. *J. Med. Chem.* 60: 4923–4931.
- 546 Danquah, A., de Zelicourt, A., Colcombet, J., and Hirt, H. (2014). The role of ABA and  
547 MAPK signaling pathways in plant abiotic stress responses. *Biotechnol. Adv.* 32: 40–  
548 52.
- 549 Dardick, C., Chen, J., Richter, T., Ouyang, S., and Ronald, P. (2007). The rice kinase  
550 database. A phylogenomic database for the rice kinome. *Plant Physiol.* 143: 579–586.
- 551 Deprost, D., Yao, L., Sormani, R., Moreau, M., Leterreux, G., Bedu, M., Robaglia, C., and  
552 Meyer, C. (2007). The Arabidopsis TOR kinase links plant growth, yield, stress  
553 resistance and mRNA translation. *EMBO Rep.* 8: 864–870.
- 554 Du, J., Yin, H., Zhang, S., Wei, Z., Zhao, B., Zhang, J., Gou, X., Lin, H., and Li, J. (2012).  
555 Somatic Embryogenesis Receptor Kinases Control Root Development Mainly via  
556 Brassinosteroid-Independent Actions in Arabidopsis thaliana. *J. Integr. Plant Biol.* 54:  
557 388–399.
- 558 Elkins, J.M. et al. (2016). Comprehensive characterization of the Published Kinase  
559 Inhibitor Set. *Nat. Biotechnol.* 34: 95–103.
- 560 Fedorov, O., Niesen, F.H., and Knapp, S. (2012). Kinase inhibitor selectivity profiling  
561 using differential scanning fluorimetry. *Methods Mol. Biol.* 795: 109–118.
- 562 Friedrichsen, D.M., Joazeiro, C.A.P., Li, J., Hunter, T., and Chory, J. (2000).  
563 Brassinosteroid-insensitive-1 is a ubiquitously expressed leucine-rich repeat receptor

- 564 serine/threonine kinase. *Plant Physiol.* 123: 1247–1255.
- 565 Garcia, A.V., Al-Yousif, M., and Hirt, H. (2012). Role of AGC kinases in plant growth and  
566 stress responses. *Cell. Mol. Life Sci.* 69: 3259–3267.
- 567 Gileadi, O., Burgess-Brown, N.A., Colebrook, S.M., Berridge, G., Savitsky, P., Smee,  
568 C.E.A., Loppnau, P., Johansson, C., Salah, E., and Pantic, N.H. (2008). High  
569 Throughput Production of Recombinant Human Proteins for Crystallography. In  
570 *Methods in molecular biology* (Clifton, N.J.), pp. 221–246.
- 571 Goff, S.A. et al. (2002). A draft sequence of the rice genome (*Oryza sativa* L. ssp.  
572 *japonica*). *Science* (80-. ). 296: 92–100.
- 573 Gou, X., Yin, H., He, K., Du, J., Yi, J., Xu, S., Lin, H., Clouse, S.D., and Li, J. (2012).  
574 Genetic evidence for an indispensable role of somatic embryogenesis receptor kinases  
575 in brassinosteroid signaling. *PLoS Genet.* 8.
- 576 Hacham, Y., Holland, N., Butterfield, C., Ubeda-Tomas, S., Bennett, M.J., Chory, J., and  
577 Savaldi-Goldstein, S. (2011). Brassinosteroid perception in the epidermis controls root  
578 meristem size. *Development* 138: 839–848.
- 579 Hanks, S.K., Quinn, A.M., and Hunter, T. (1988). The Protein Kinase Family: Conserved  
580 Features and Deduced Phylogeny of the Catalytic Domains. *Science* (80-. ). 241: 42–  
581 52.
- 582 Hicks, G.R. and Raikhel, N. V. (2009). Opportunities and challenges in plant chemical  
583 biology. *Nat. Chem. Biol.* 5: 268–273.
- 584 Hicks, G.R. and Raikhel, N. V. (2014). Plant chemical biology: are we meeting the  
585 promise? *Front. Plant Sci.* 5.
- 586 Huber, K.V.M. and Superti-Furga, G. (2016). Profiling of small molecules by chemical  
587 proteomics. In *Methods in Molecular Biology*, pp. 211–218.
- 588 Jones, L.H. and Bunnage, M.E. (2017). Applications of chemogenomic library screening in  
589 drug discovery. *Nat. Rev. Drug Discov.* 2017 164 16: 285–296.
- 590 Jung, K.H., Cao, P., Sharma, R., Jain, R., and Ronald, P.C. (2015). Phylogenomics

- 591 databases for facilitating functional genomics in rice. *Rice* 8.
- 592 Kang, Y.H., Breda, A., and Hardtke, C.S. (2017). Brassinosteroid signaling directs  
593 formative cell divisions and protophloem differentiation in *Arabidopsis* root  
594 meristems. *Development* 144: 272–280.
- 595 Kawahara, Y. et al. (2013). Improvement of the *Oryza sativa* Nipponbare reference genome  
596 using next generation sequence and optical map data. *Rice* (N. Y). 6: 3–10.
- 597 Lee, I., Seo, Y.S., Coltrane, D., Hwang, S., Oh, T., Marcotte, E.M., and Ronald, P.C.  
598 (2011). Genetic dissection of the biotic stress response using a genome-scale gene  
599 network for rice. *Proc. Natl. Acad. Sci. U. S. A.* 108: 18548–18553.
- 600 Lee, T., Oh, T., Yang, S., Shin, J., Hwang, S., Kim, C.Y., Kim, H., Shim, H., Shim, J.E.,  
601 Ronald, P.C., and Lee, I. (2015). RiceNet v2: An improved network prioritization  
602 server for rice genes. *Nucleic Acids Res.* 43: W122–W127.
- 603 Li, J. and Chory, J. (1997). A putative leucine-rich repeat receptor kinase involved in  
604 brassinosteroid signal transduction. *Cell* 90: 929–938.
- 605 Manning, G., Whyte, D.B., Martinez, R., Hunter, T., and Sudarsanam, S. (2002). The  
606 protein kinase complement of the human genome. *Science* (80-. ). 298: 1912–1934.
- 607 Marshall, A. et al. (2012). Tackling drought stress: receptor-like kinases present new  
608 approaches. *Plant Cell* 24: 2262–2278.
- 609 Matsubayashi, Y., Ogawa, M., Kihara, H., Niwa, M., and Sakagami, Y. (2006). Disruption  
610 and overexpression of *Arabidopsis* phytosulfokine receptor gene affects cellular  
611 longevity and potential for growth. *Plant Physiol.* 142: 45–53.
- 612 Matsubayashi, Y., Ogawa, M., Morita, A., and Sakagami, Y. (2002). An LRR receptor  
613 kinase involved in perception of a peptide plant hormone, phytosulfokine. *Science*  
614 (80-. ). 296: 1470–1472.
- 615 Matsuzaki, Y., Ogawa-Ohnishi, M., Mori, A., and Matsubayashi, Y. (2010). Secreted  
616 peptide signals required for maintenance of root stem cell niche in *Arabidopsis*.  
617 *Science* (80-. ). 329: 1065–1067.

- 618 Mistry, J., Chuguransky, S., Williams, L., Qureshi, M., Salazar, G.A., Sonnhammer, E.L.L.,  
619 Tosatto, S.C.E., Paladin, L., Raj, S., Richardson, L.J., Finn, R.D., and Bateman, A.  
620 (2021). Pfam: The protein families database in 2021. *Nucleic Acids Res.* 49: D412–  
621 D419.
- 622 Niesen, F.H., Berglund, H., and Vedadi, M. (2007). The use of differential scanning  
623 fluorimetry to detect ligand interactions that promote protein stability. *Nat. Protoc.* 2:  
624 2212–2221.
- 625 Osakabe, Y., Yamaguchi-Shinozaki, K., Shinozaki, K., and Tran, L.S.P. (2013). Sensing  
626 the environment: key roles of membrane-localized kinases in plant perception and  
627 response to abiotic stress. *J. Exp. Bot.* 64: 445–458.
- 628 Peña, I. et al. (2015). New compound sets identified from high throughput phenotypic  
629 screening against three kinetoplastid parasites: an open resource. *Sci. Rep.* 5.
- 630 Posy, S.L., Hermsmeier, M.A., Vaccaro, W., Ott, K.H., Todderud, G., Lippy, J.S., Trainor,  
631 G.L., Loughney, D.A., and Johnson, S.R. (2011). Trends in kinase selectivity: Insights  
632 for target class-focused library screening. *J. Med. Chem.* 54: 54–66.
- 633 Pruitt, R.N., Joe, A., Zhang, W., Feng, W., Stewart, V., Schwessinger, B., Dinneny, J.R.,  
634 and Ronald, P.C. (2017). A microbially derived tyrosine-sulfated peptide mimics a  
635 plant peptide hormone. *New Phytol.* 215: 725–736.
- 636 Savitsky, P., Bray, J., Cooper, C.D.O., Marsden, B.D., Mahajan, P., Burgess-Brown, N.A.,  
637 and Gileadi, O. (2010). High-throughput production of human proteins for  
638 crystallization: The SGC experience. *J. Struct. Biol.* 172: 3–13.
- 639 Schindelin, J. et al. (2012). Fiji: an open-source platform for biological-image analysis. *Nat.*  
640 *Methods* 2012 97 9: 676–682.
- 641 Song, W.Y., Pi, L.Y., Wang, G.L., Gardner, J., Holsten, T., and Ronald, P.C. (1997).  
642 Evolution of the rice Xa21 disease resistance gene family. *Plant Cell* 9: 1279–1287.
- 643 Stols, L., Gu, M., Dieckman, L., Raffin, R., Collart, F.R., and Donnelly, M.I. (2002). A  
644 New Vector for High-Throughput, Ligation-Independent Cloning Encoding a Tobacco  
645 Etch Virus Protease Cleavage Site. *Protein Expr. Purif.* 25: 8–15.



- 646 Strain-Damerell, C., Mahajan, P., Gileadi, O., and Burgess-Brown, N.A. (2014). Medium-  
647 throughput production of recombinant human proteins: Ligation-independent cloning.  
648 *Methods Mol. Biol.* 1091: 55–72.
- 649 Takatsuka, H. and Umeda, M. (2014). Hormonal control of cell division and elongation  
650 along differentiation trajectories in roots. *J. Exp. Bot.* 65: 2633–2643.
- 651 Taylor, I., Lehner, K., McCaskey, E., Nirmal, N., Ozkan-Aydin, Y., Murray-Cooper, M.,  
652 Jain, R., Hawkes, E.W., Ronald, P.C., Goldman, D.I., and Benfey, P.N. (2021).  
653 Mechanism and function of root circumnutation. *Proc. Natl. Acad. Sci. U. S. A.* 118.
- 654 Todaka, D., Shinozaki, K., and Yamaguchi-Shinozaki, K. (2015). Recent advances in the  
655 dissection of drought-stress regulatory networks and strategies for development of  
656 drought-tolerant transgenic rice plants. *Front. Plant Sci.* 6.
- 657 Tosarini, T.R., Ramos, P.Z., Profeta, G.S., Baroni, R.M., Massirer, K.B., Couñago, R.M.,  
658 and Mondego, J.M.C. (2018). Cloning, expression and purification of kinase domains  
659 of cacao PR-1 receptor-like kinases. *Protein Expr. Purif.* 146: 78–84.
- 660 Uitdehaag, J.C.M., Verkaar, F., Alwan, H., De Man, J., Buijsman, R.C., and Zaman, G.J.R.  
661 (2012). A guide to picking the most selective kinase inhibitor tool compounds for  
662 pharmacological validation of drug targets. *Br. J. Pharmacol.* 166: 858–876.
- 663 Wang, Y., Suo, H., Zheng, Y., Liu, K., Zhuang, C., Kahle, K.T., Ma, H., and Yan, X.  
664 (2010). The soybean root-specific protein kinase GmWNK1 regulates stress-  
665 responsive ABA signaling on the root system architecture. *Plant J.* 64: 230–242.
- 666 Wells, C.I. et al. (2021). The kinase chemogenomic set (KCGS): An open science resource  
667 for kinase vulnerability identification. *Int. J. Mol. Sci.* 22: 1–18.
- 668 Wierzba, M.P. and Tax, F.E. (2013). Notes from the underground: receptor-like kinases in  
669 *Arabidopsis* root development. *J. Integr. Plant Biol.* 55: 1224–1237.
- 670 Williams, T.E. et al. (2015). Discovery of RAF265: A Potent mut-B-RAF Inhibitor for the  
671 Treatment of Metastatic Melanoma. *ACS Med. Chem. Lett.* 6: 961–965.
- 672 Wu, W. and Cheng, S. (2014). Root genetic research, an opportunity and challenge to rice

- 673 improvement. *F. Crop. Res.* 165: 111–124.
- 674 Xuan, W., Murphy, E., Beeckman, T., Audenaert, D., and De Smet, I. (2013). Synthetic  
675 molecules: helping to unravel plant signal transduction. *J. Chem. Biol.* 6: 43.
- 676 Yamamoto, E., Yonemaru, J. ichi, Yamamoto, T., and Yano, M. (2012). OGRO: The  
677 Overview of functionally characterized Genes in Rice online database. *Rice (N. Y.)*. 5:  
678 1–10.
- 679 Yu, J. et al. (2002). A draft sequence of the rice genome (*Oryza sativa* L. ssp. indica).  
680 *Science* (80-. ). 296: 79–92.
- 681
